# Supplementary material for: Three-month and six-month outcomes of patients with COVID-19 associated hyperinflammation treated with short-term immunosuppressive therapy: follow-up of the CHIC study
Source: HighWire-hosted journal article supplement (doi:10.1136/rmdopen-2021-001906), 2021-11-01
Supplement: rmdopen-2021-001906supp001_data_supplement.pdf [file rmdopen-2021-001906supp001_data_supplement.pdf]

Three- and six month outcomes of patients with COVID-19-associated hyperinflammation treated with short-term immunosuppressive therapy: follow-up of the CHIC study

Supplementary Figure S1. Flowchart of included patients

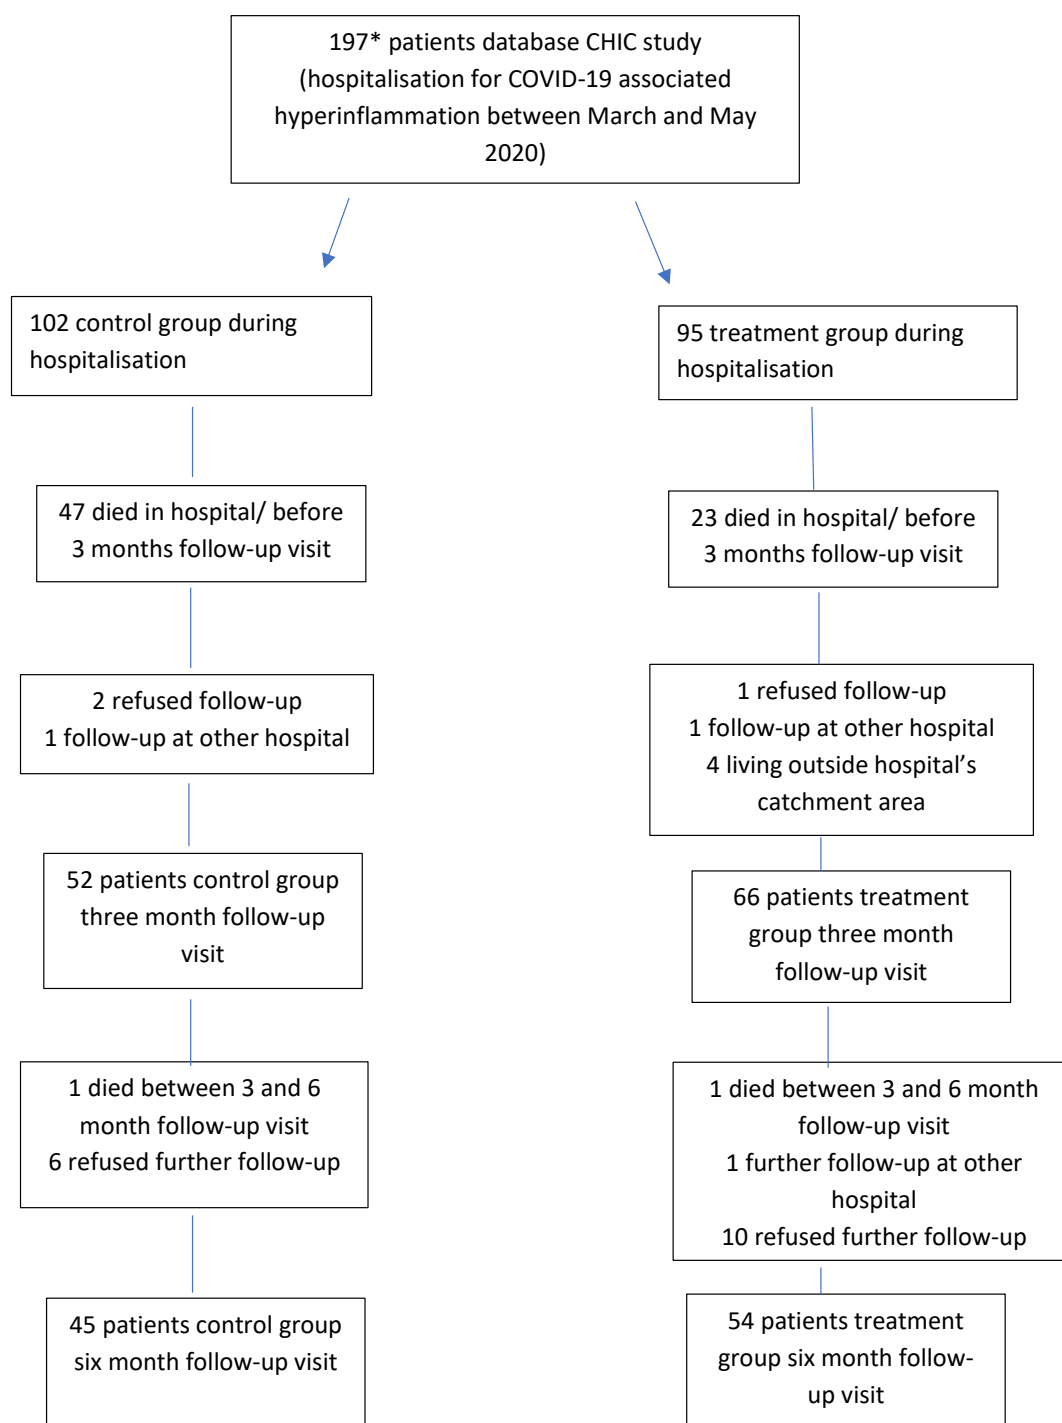

\* This number refers to patients included in the CHIC dataset before matching of patients according to age and gender took place.

Supplementary Table S1. The modified Medical Research Council dyspnoea scale

| Grade   | Description of breathlessness                                                                                                                               |
|---------|-------------------------------------------------------------------------------------------------------------------------------------------------------------|
| Grade 0 | I only get breathless with strenuous exercise                                                                                                               |
| Grade 1 | I get short of breath when hurrying on level ground or walking up a slight hill                                                                             |
| Grade 2 | On level ground, I walk slower than people of the same age because of breathlessness, or I have to stop for breath when walking at my own pace on the level |
| Grade 3 | I stop for breath after walking about 100 yards or after a few minutes on level ground                                                                      |
| Grade 4 | I am too breathless to leave to house or I am breathless when dressing                                                                                      |

Reference: Williams N. The MRC breathlessness scale. *Occup Med (Lond)* 2017;67:496-497.
